# Supplementary material
Source: Royal Society of Chemistry journal article supplement (doi:10.1039/d6ee01331g)
Supplement: d6ee01331g1.pdf [file d6ee01331g1.pdf]

Supplementary Information *for*

**Environmental and geographic constraints shape global pumped hydro for long-duration storage**

Rongrong Xu<sup>1,2,3</sup>, Zhenzhong Zeng<sup>1,2,3\*</sup>, Alan D. Ziegler<sup>4</sup>, Lee E. Brown<sup>5</sup>, Joseph Holden<sup>5</sup>,  
Dominick V. Spracklen<sup>6</sup>, Deliang Chen<sup>7</sup>, Yuntian Chen<sup>2,3\*</sup>, Tianyun Dong<sup>1,2</sup>, Yaling Zeng<sup>1</sup>,  
Peirong Lin<sup>8</sup>, Yuan Yang<sup>9</sup>, Ming Pan<sup>9</sup>, Dongxiao Zhang<sup>2,3\*</sup>

<sup>1</sup> School of Environmental Science and Engineering, Southern University of Science and Technology, Shenzhen 518055, China

<sup>2</sup> Ningbo Institute of Digital Twin, Eastern Institute of Technology, Ningbo 315201, China

<sup>3</sup> Zhejiang Key Laboratory of Industrial Intelligence and Digital Twin, Eastern Institute of Technology, Ningbo, Zhejiang, China

<sup>4</sup> Andaman Coastal Research Station for Development, Kasetsart University, Ranong, Thailand

<sup>5</sup> School of Geography & water@leeds, University of Leeds, Leeds, UK

<sup>6</sup> School of Earth and Environment, University of Leeds, Leeds, UK

<sup>7</sup> Department of Earth System Science, Tsinghua University, Beijing, China

<sup>8</sup> Institute of Remote Sensing and Geographic Information System (IRSGIS), Peking University, Beijing, China

<sup>9</sup> Scripps Institution of Oceanography, University of California San Diego, San Diego, California 92037, USA

\*Correspondence to: zengzz@sustech.edu.cn (Z. Zeng), ychen@eitech.edu.cn (Y. Chen), dzhang@eitech.edu.cn (D. Zhang)

Manuscript for *Energy & Environment Science*

May 14, 2026

**The PDF file includes:**

Figures S1 to S23

Tables S1 to S4

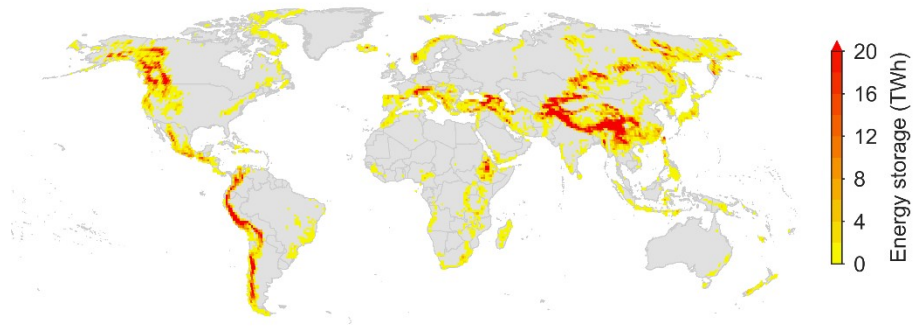

**Fig. S1. Spatial distribution of global PHS potential.** The PHS potential is gridded as a 1-degree global raster. Gray areas indicate regions with no PHS resources.

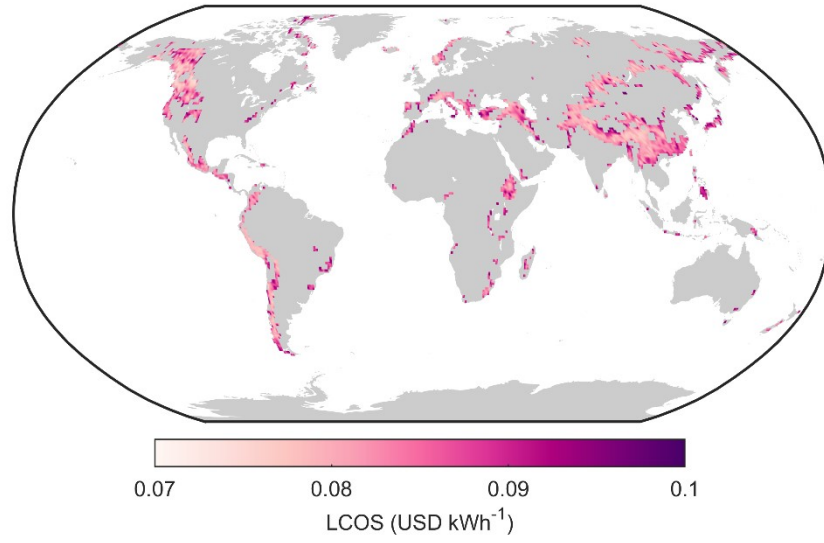

**Fig. S2. Global distribution of LCOS for PHS.** Gray areas indicate regions with no PHS potential.

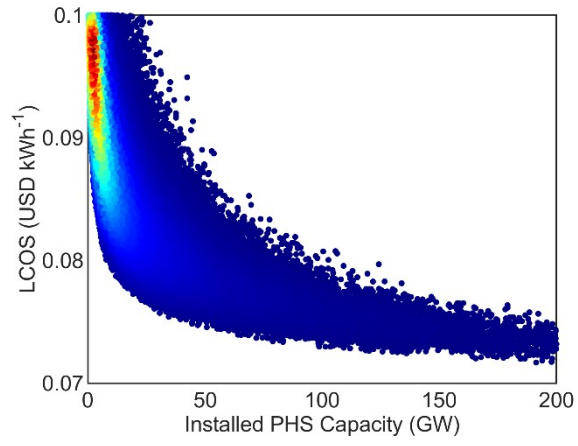

**Fig. S3. Relationship between installed PHS capacity and LCOS.** Each point represents a candidate PHS project.

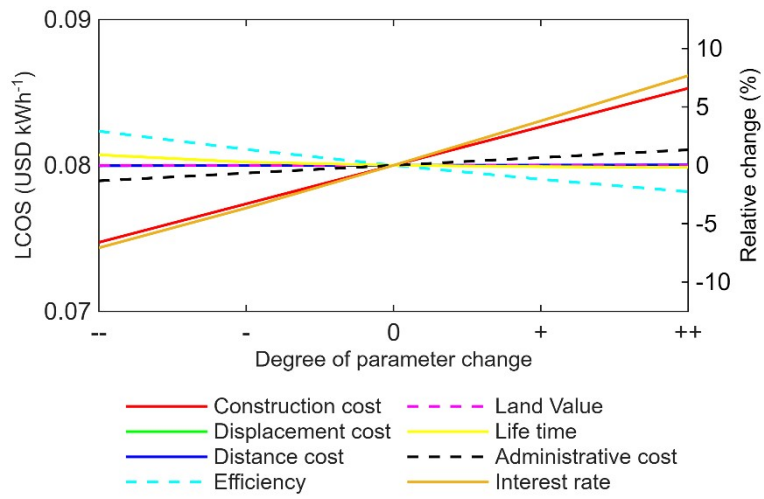

**Fig. S4. Sensitivity analysis of key parameters of PHS costs.** The detailed parameter adjustment scheme is shown in Table S3.

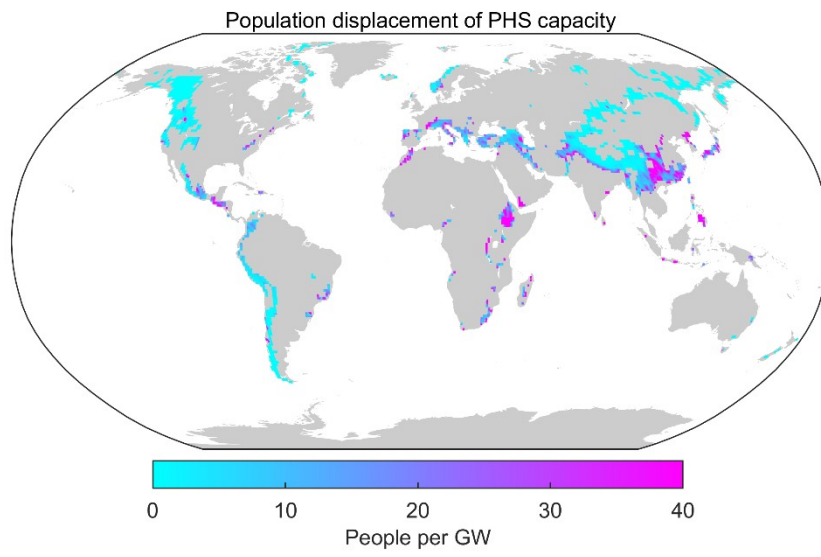

**Fig. S5. Population displacement intensity associated with PHS capacity.**

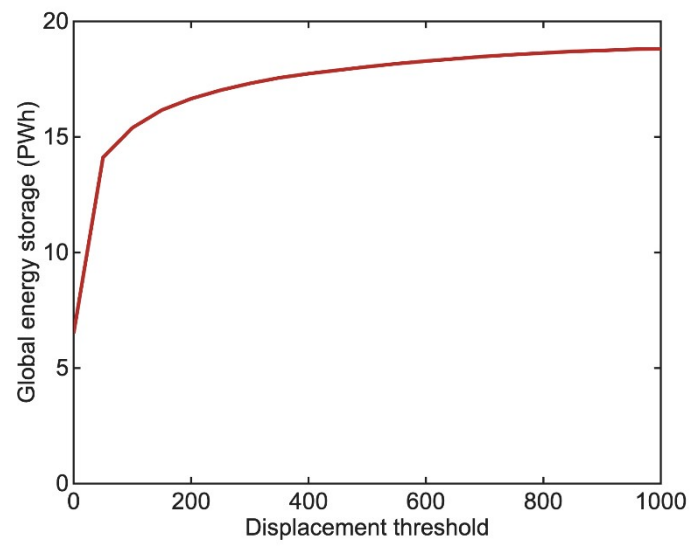

**Fig. S6. Global PHS energy storage potential under varying displacement thresholds.**

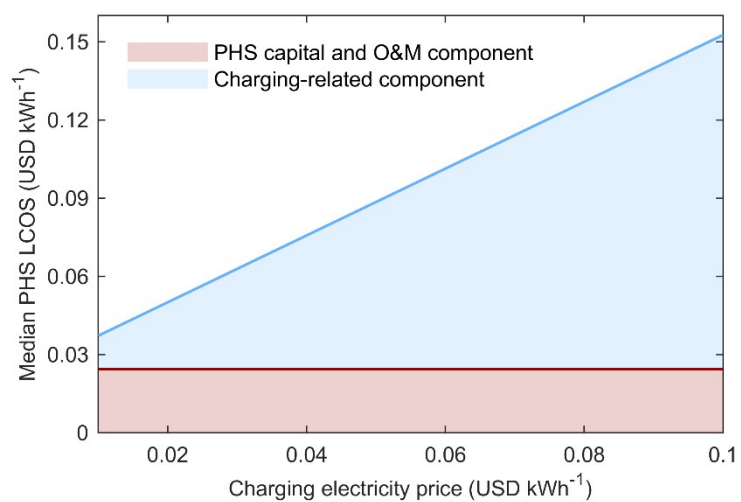

**Fig. S7. Decomposition of PHS LCOS with respect to charging electricity price.**

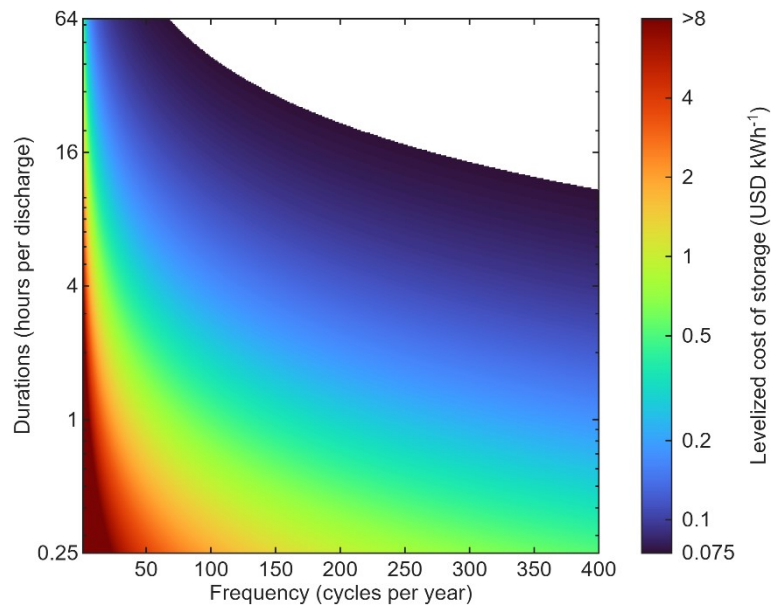

**Fig. S8. LCOS of PHS across discharge duration and cycling frequency.**

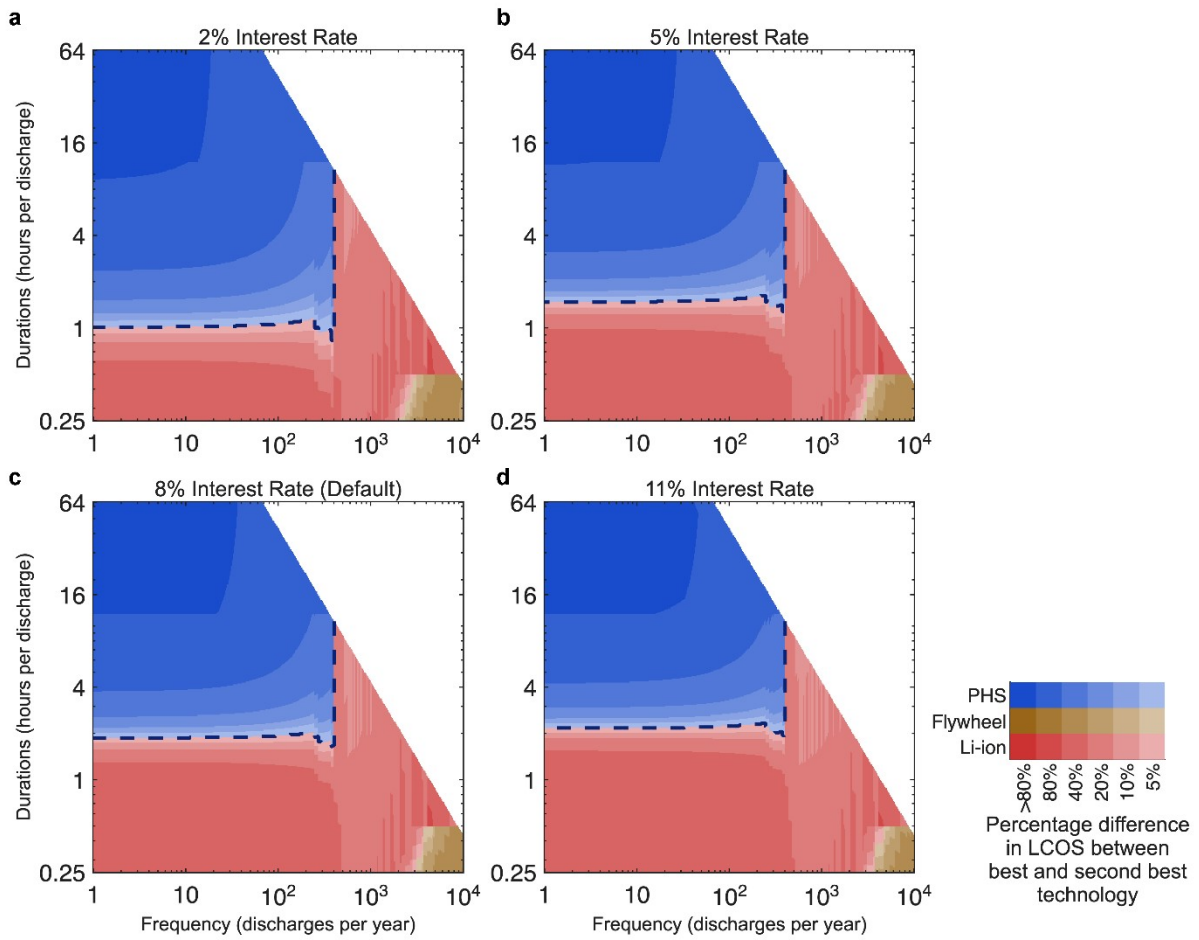

**Fig. S9. Cost competitiveness of energy storage technologies across discharge duration and cycling frequency under different interest rates. (a) 2% interest rate. (b) 5% interest rate. (c) 8% interest rate. (d) 11% interest rate.** Each panel shows the technology with the lowest LCOS under a given combination of discharge duration and annual cycling frequency. Colors indicate the percentage cost difference between the most competitive technology and the second-best option.

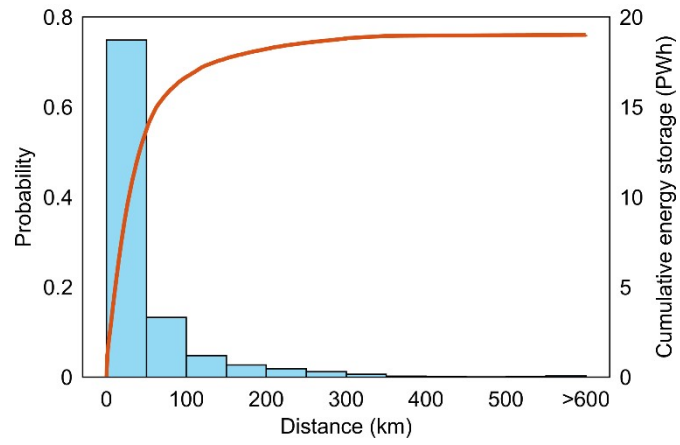

**Fig. S10. Distance of PHS sites from high-voltage grids, with probability distribution and cumulative energy storage.**

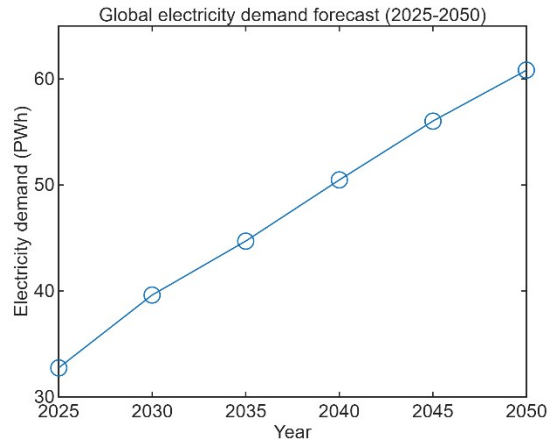

**Fig. S11. Projected growth of global electricity demand from 2025 to 2050 (ref. 28).**

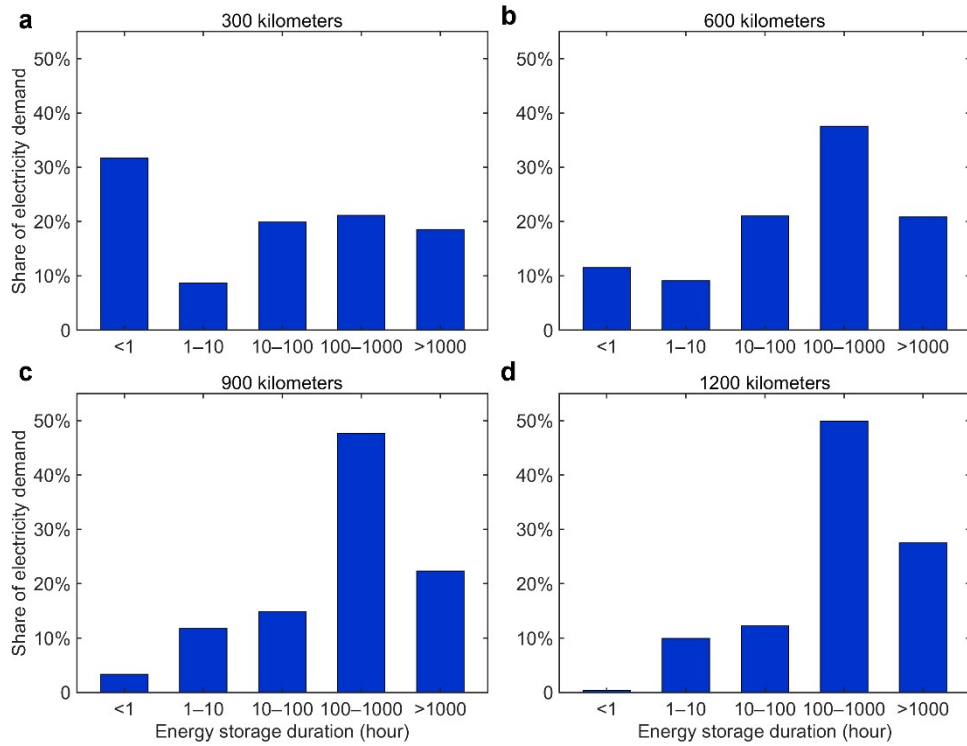

**Fig. S12. Distribution of global electricity demand by accessible PHS storage duration under different service radius. (a) 300 km transmission distance. (b) 600 km transmission distance. (c) 900 km transmission distance. (d) 1,200 km transmission distance.**

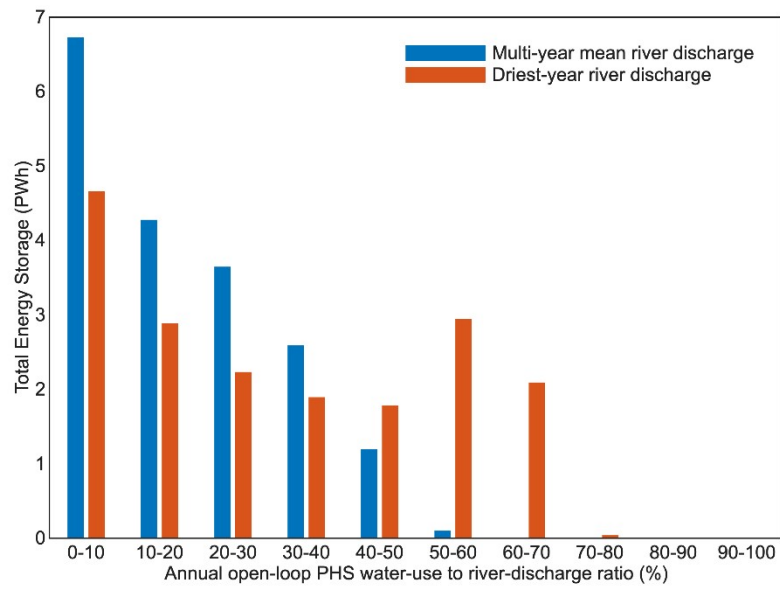

**Fig. S13. Open-loop PHS water-use ratios under mean and driest-year river discharge.**

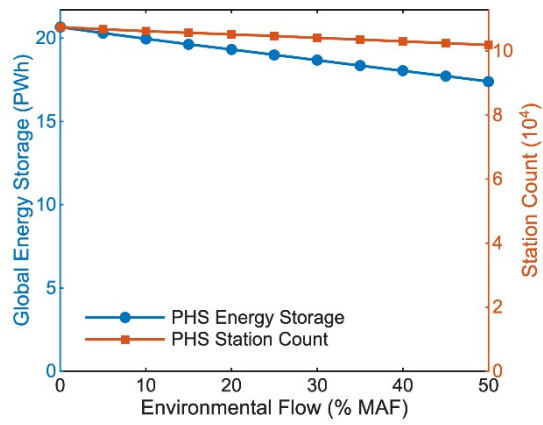

**Fig. S14. Sensitivity of open-loop PHS potential and station count to environmental-flow requirements.**

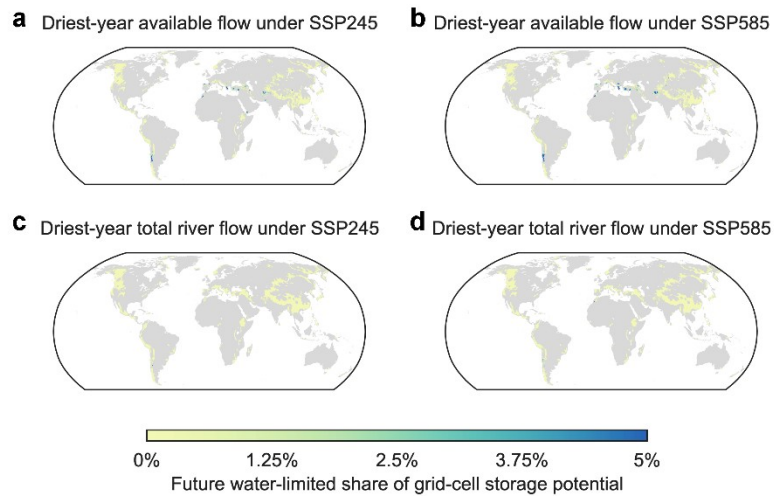

**Fig. S15. Future water-limited share of open-loop PHS resources under SSP245 and SSP585.** (a) Future water-limited PHS share based on driest-year available flow under SSP245. (b) Future water-limited PHS share based on driest-year available flow under SSP585. (c) Future water-limited PHS share based on driest-year total river flow under SSP245. (d) Future water-limited PHS share based on driest-year total river flow under SSP585. Available flow is defined as total river flow minus environmental-flow requirements.

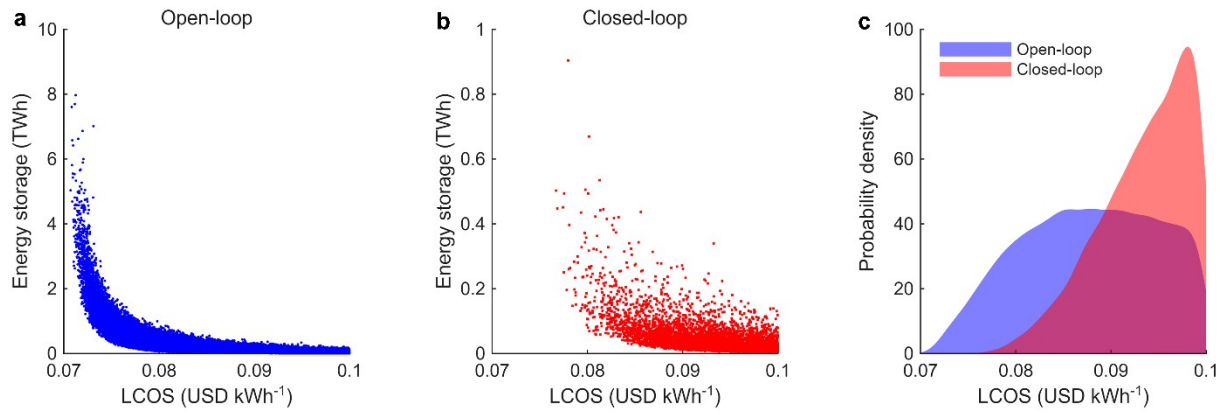

**Fig. S16. Systematic differences in storage scale and cost between open-loop and closed-loop PHS.** (a) Relationship between energy storage capacity and LCOS for open-loop PHS sites. (b) Relationship between energy storage capacity and LCOS for closed-loop PHS sites. (c) Probability density distributions of LCOS for open-loop and closed-loop PHS.

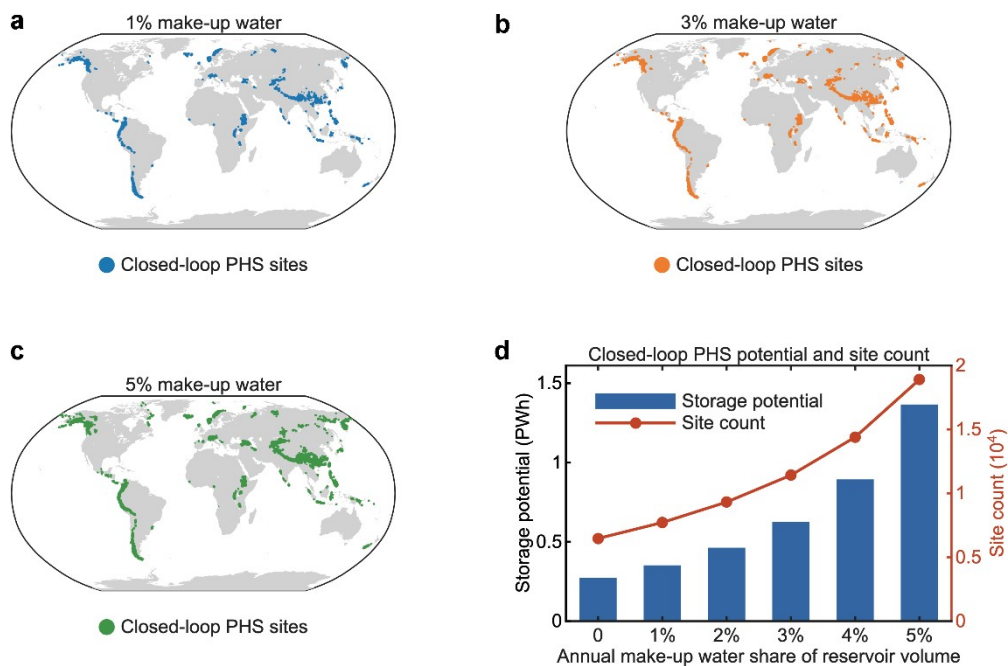

**Fig. S17. Spatial distribution and global potential of closed-loop PHS under make-up water allowances. (a–c)** Sites with annual make-up water equivalent to 1%, 3% and 5% of reservoir volume. **(d)** Global storage potential and site count under 0–5% make-up water.

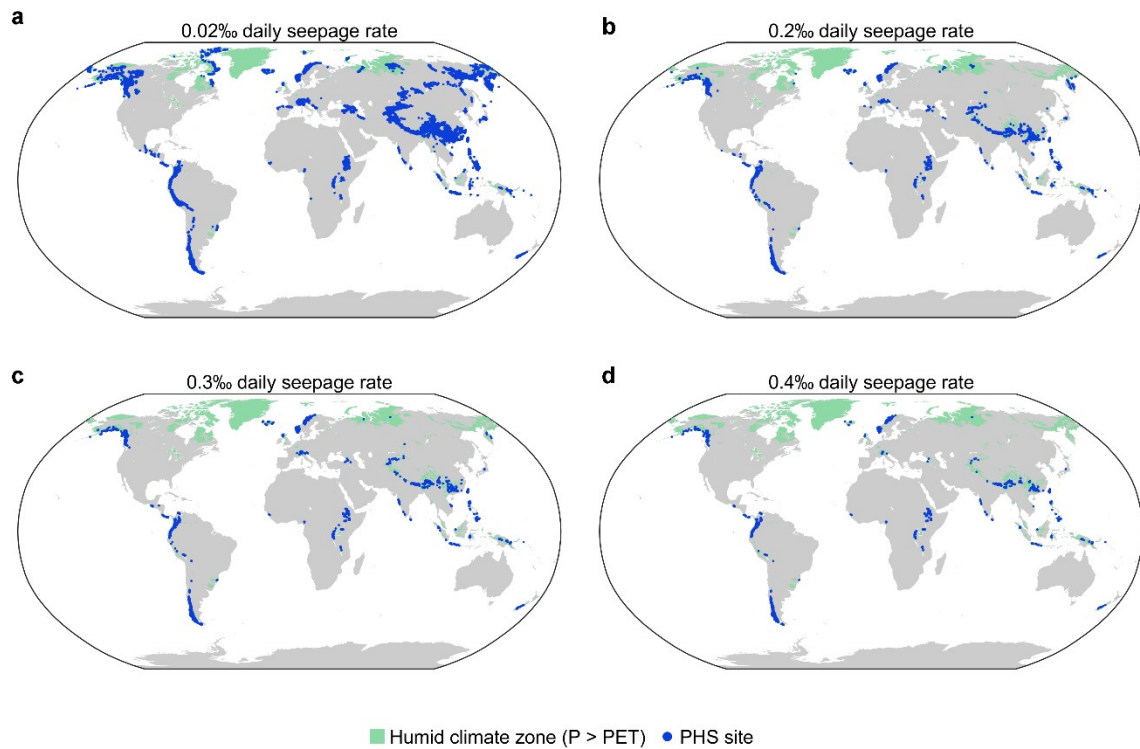

**Fig. S18. Global distribution of closed-loop PHS sites under different reservoir seepage rates. (a) 0.02‰ daily seepage rate. (b) 0.2‰ daily seepage rate. (c) 0.3‰ daily seepage rate. (d) 0.4‰ daily seepage rate.** Green shading indicates humid climate zones where precipitation exceeds potential evapotranspiration ( $P > PET$ ), and blue dots denote identified closed-loop PHS sites.

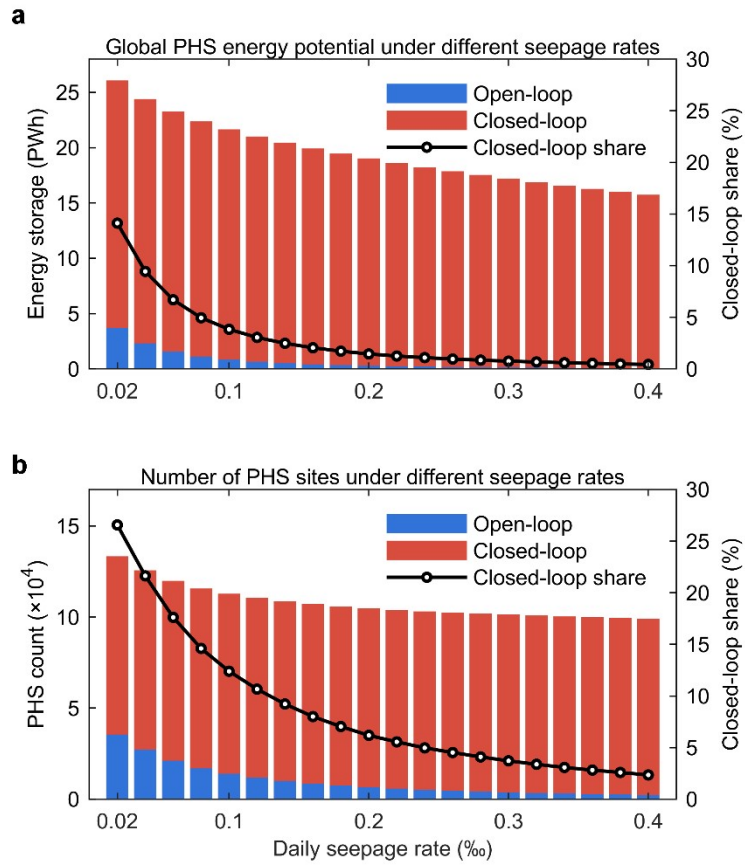

**Fig. S19. Sensitivity of global PHS potential and site availability to reservoir seepage rate.** (a) Global PHS energy storage potential under different daily seepage rates. (b) Number of PHS sites under different daily seepage rates

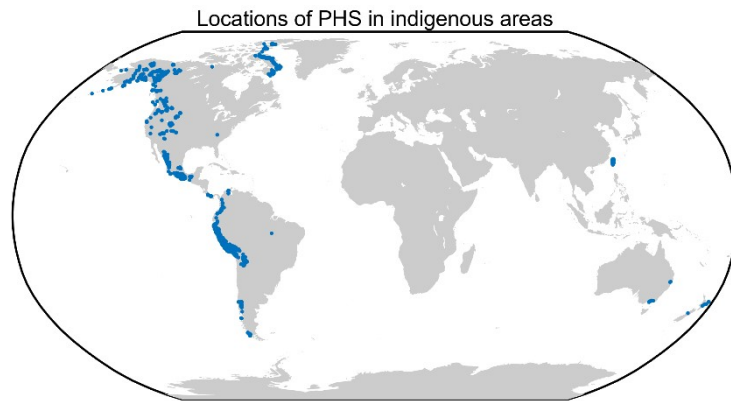

**Fig. S20. Global distribution of potential PHS sites within Indigenous territories.**

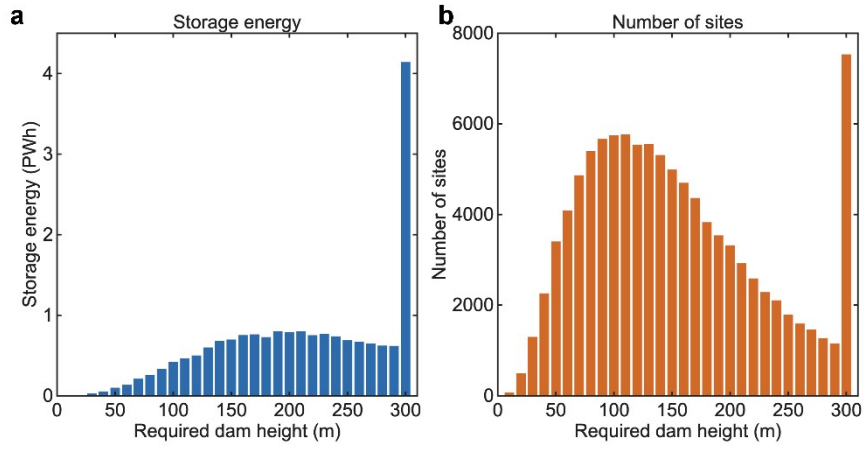

**Fig. S21. Storage energy and site count by required dam height. (a)** Storage energy by required dam height. **(b)** Number of PHS sites by required dam height.

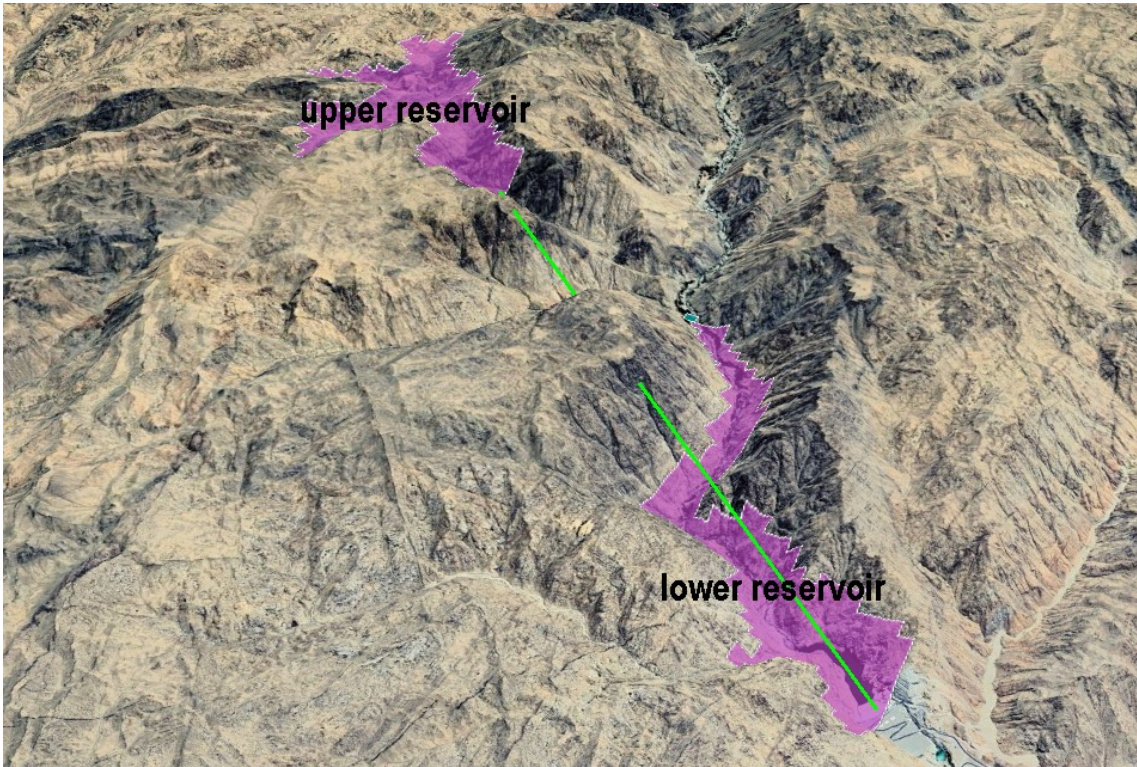

**Fig. S22. Visualization of optimized PHS site locations.**

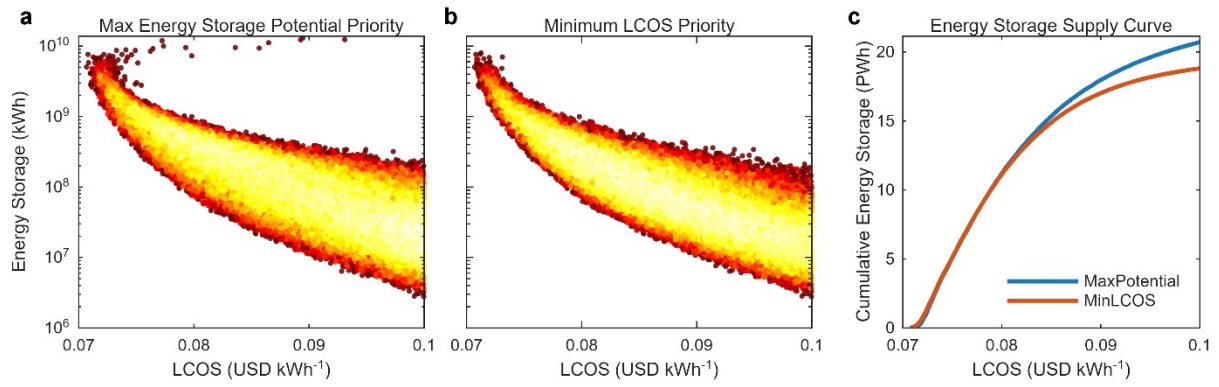

**Fig. S23. PHS site selection under maximum-storage and minimum-LCOS prioritization.**

(a) Candidate sites prioritized by maximum energy storage potential. (b) Candidate sites prioritized by minimum LCOS. (c) Global PHS storage supply curves under the two prioritization strategies.

**Table S1. Pumped hydroelectric storage resource, LCOS, storage duration, and per capita energy storage in the countries and territories that have PHS resources.** The units for total energy storage and per capita pumped storage are terawatt-hours (TWh) and kilowatt-hours (kWh), respectively. Storage duration is the equivalent number of hours that PHS resources in each country or territory could meet projected 2050 electricity demand. LCOS indicates the average LCOS (USD kWh<sup>-1</sup>) of PHS within each country or territory. Uncertainty ranges are derived from MERIT-DEM.

| Country       | Energy storage | LCOS  | Storage duration | Per capita energy storage |
|---------------|----------------|-------|------------------|---------------------------|
| China         | 5568 ± 744     | 0.079 | 3346             | 3919                      |
| Russia        | 2162 ± 293     | 0.080 | 3969             | 15270                     |
| Canada        | 1900 ± 237     | 0.078 | 6591             | 51488                     |
| Peru          | 969 ± 127      | 0.079 | >8760            | 30709                     |
| India         | 722 ± 89       | 0.080 | 2129             | 551                       |
| United States | 706 ± 113      | 0.080 | 445              | 2157                      |
| Chile         | 665 ± 86       | 0.079 | >8760            | 36937                     |
| Turkey        | 507 ± 84       | 0.080 | 7867             | 6246                      |
| Kyrgyzstan    | 475 ± 60       | 0.080 | >8760            | 81957                     |
| Afghanistan   | 449 ± 63       | 0.080 | >8760            | 14734                     |
| Pakistan      | 391 ± 47       | 0.080 | >8760            | 1715                      |
| Colombia      | 330 ± 51       | 0.082 | >8760            | 6806                      |
| Ethiopia      | 292 ± 58       | 0.081 | >8760            | 2689                      |
| Bolivia       | 284 ± 39       | 0.079 | >8760            | 24963                     |
| Mexico        | 281 ± 48       | 0.081 | 3400             | 2208                      |
| Nepal         | 263 ± 33       | 0.081 | >8760            | 8774                      |
| Argentina     | 262 ± 41       | 0.080 | >8760            | 5787                      |
| Tajikistan    | 256 ± 32       | 0.080 | >8760            | 29377                     |
| Italy         | 192 ± 26       | 0.080 | 1399             | 3103                      |
| Norway        | 188 ± 35       | 0.079 | 2422             | 36232                     |
| Iran          | 183 ± 34       | 0.082 | 3015             | 2180                      |
| Myanmar       | 150 ± 25       | 0.082 | >8760            | 2721                      |
| Georgia       | 139 ± 16       | 0.079 | >8760            | 28267                     |
| Ecuador       | 135 ± 21       | 0.082 | >8760            | 8112                      |
| Kazakhstan    | 100 ± 15       | 0.081 | 3030             | 5272                      |
| Austria       | 76 ± 9         | 0.080 | 2772             | 8655                      |
| France        | 74 ± 10        | 0.080 | 317              | 1132                      |
| Switzerland   | 59 ± 8         | 0.080 | 2188             | 7007                      |
| Japan         | 53 ± 8         | 0.084 | 131              | 422                       |
| Spain         | 52 ± 9         | 0.082 | 461              | 1068                      |
| Iceland       | 47 ± 7         | 0.078 | 7587             | 143929                    |
| Vietnam       | 46 ± 8         | 0.083 | 2543             | 472                       |

| Country                          | Energy storage | LCOS  | Storage duration | Per capita energy storage |
|----------------------------------|----------------|-------|------------------|---------------------------|
| Uzbekistan                       | 43 ± 6         | 0.081 | 2122             | 1403                      |
| Azerbaijan                       | 40 ± 7         | 0.082 | 6257             | 3999                      |
| Guatemala                        | 38 ± 7         | 0.083 | >8760            | 2283                      |
| Greece                           | 37 ± 7         | 0.083 | 1969             | 3509                      |
| Mongolia                         | 37 ± 8         | 0.082 | >8760            | 11694                     |
| North Korea                      | 32 ± 7         | 0.087 | >8760            | 1254                      |
| Philippines                      | 31 ± 6         | 0.085 | 2363             | 292                       |
| Albania                          | 29 ± 5         | 0.080 | >8760            | 9603                      |
| Romania                          | 28 ± 5         | 0.084 | >8760            | 1319                      |
| Indonesia                        | 27 ± 6         | 0.086 | 831              | 104                       |
| Bosnia and Herzegovina           | 26 ± 6         | 0.081 | 6511             | 6836                      |
| Iraq                             | 25 ± 4         | 0.082 | 1520             | 633                       |
| New Zealand                      | 22 ± 4         | 0.084 | 653              | 4676                      |
| Honduras                         | 21 ± 5         | 0.083 | >8760            | 2365                      |
| Morocco                          | 21 ± 5         | 0.085 | 3026             | 607                       |
| Armenia                          | 20 ± 4         | 0.083 | >8760            | 6600                      |
| Tanzania                         | 20 ± 6         | 0.085 | 7731             | 352                       |
| South Africa                     | 18 ± 5         | 0.084 | 236              | 318                       |
| Yemen                            | 17 ± 4         | 0.085 | >8760            | 599                       |
| Lesotho                          | 17 ± 4         | 0.082 | >8760            | 8655                      |
| Brazil                           | 16 ± 5         | 0.085 | 101              | 78                        |
| Madagascar                       | 16 ± 5         | 0.083 | >8760            | 604                       |
| Montenegro                       | 15 ± 3         | 0.079 | 4645             | 26385                     |
| Democratic Republic of the Congo | 15 ± 4         | 0.084 | 7265             | 153                       |
| Laos                             | 14 ± 3         | 0.086 | >8760            | 1882                      |
| Eritrea                          | 12 ± 2         | 0.083 | >8760            | 2085                      |
| Bulgaria                         | 12 ± 3         | 0.086 | 828              | 1699                      |
| Timor-Leste                      | 12 ± 2         | 0.083 | >8760            | 8827                      |
| Venezuela                        | 11 ± 2         | 0.082 | 722              | 401                       |
| Cameroon                         | 11 ± 3         | 0.084 | 6204             | 389                       |
| Haiti                            | 8 ± 1          | 0.083 | 3763             | 755                       |
| Sweden                           | 8 ± 2          | 0.080 | 86               | 794                       |
| Papua New Guinea                 | 7 ± 2          | 0.087 | >8760            | 1056                      |
| Algeria                          | 7 ± 2          | 0.087 | 717              | 173                       |
| Macedonia                        | 7 ± 2          | 0.086 | 3099             | 3344                      |
| Serbia                           | 7 ± 2          | 0.084 | 478              | 976                       |
| Bhutan                           | 6 ± 1          | 0.085 | >8760            | 7854                      |
| Portugal                         | 6 ± 2          | 0.083 | 345              | 594                       |
| New Caledonia                    | 6 ± 1          | 0.085 | >8760            | 21850                     |

| Country            | Energy storage | LCOS  | Storage duration | Per capita energy storage |
|--------------------|----------------|-------|------------------|---------------------------|
| Slovenia           | 6 ± 1          | 0.084 | 1089             | 2758                      |
| Croatia            | 6 ± 2          | 0.081 | 1065             | 1345                      |
| Kenya              | 6 ± 1          | 0.086 | 2641             | 107                       |
| Nigeria            | 5 ± 1          | 0.085 | 1078             | 24                        |
| Kosovo             | 5 ± 1          | 0.083 | >8760            | 2411                      |
| Ukraine            | 5 ± 1          | 0.086 | 58               | 105                       |
| Lebanon            | 5 ± 1          | 0.085 | 1485             | 685                       |
| Costa Rica         | 4 ± 1          | 0.086 | 2075             | 877                       |
| Guinea             | 4 ± 2          | 0.086 | >8760            | 331                       |
| Panama             | 4 ± 1          | 0.087 | 1709             | 995                       |
| Angola             | 3 ± 1          | 0.087 | 1523             | 98                        |
| Sri Lanka          | 3 ± 1          | 0.084 | 1275             | 136                       |
| Burundi            | 3 ± 1          | 0.087 | >8760            | 262                       |
| Dominican Republic | 3 ± 1          | 0.088 | 885              | 290                       |
| Svalbard           | 2 ± 0          | 0.086 | >8760            | 1173958                   |
| United Kingdom     | 2 ± 0          | 0.085 | 12               | 35                        |
| Zambia             | 2 ± 1          | 0.077 | 910              | 133                       |
| El Salvador        | 2 ± 0          | 0.085 | 1165             | 324                       |
| Australia          | 2 ± 1          | 0.090 | 14               | 82                        |
| Thailand           | 2 ± 1          | 0.087 | 66               | 29                        |
| Uganda             | 2 ± 0          | 0.090 | >8760            | 39                        |
| South Korea        | 2 ± 0          | 0.090 | 11               | 30                        |
| Mozambique         | 1 ± 1          | 0.084 | 635              | 50                        |
| Zimbabwe           | 1 ± 1          | 0.086 | 752              | 102                       |
| Syria              | 1 ± 0          | 0.086 | 124              | 53                        |
| Malawi             | 1 ± 0          | 0.086 | >8760            | 46                        |
| Saudi Arabia       | 1 ± 0          | 0.090 | 12               | 27                        |
| Swaziland          | 1 ± 0          | 0.084 | >8760            | 831                       |
| Germany            | 1 ± 0          | 0.086 | 3                | 11                        |
| Nicaragua          | 1 ± 0          | 0.091 | 483              | 140                       |
| Rwanda             | 1 ± 0          | 0.091 | >8760            | 64                        |
| Jordan             | 1 ± 0          | 0.086 | 235              | 63                        |
| Cuba               | 1 ± 0          | 0.088 | >8760            | 54                        |

**Table S2. The cost calculation formula for PHS systems.**

| Cost component                    | Equation                                                                                                                                                                                                    | Ref.   |
|-----------------------------------|-------------------------------------------------------------------------------------------------------------------------------------------------------------------------------------------------------------|--------|
| <b>Power components Cost</b>      |                                                                                                                                                                                                             |        |
| Turbine (USD)                     | $p_1 = 1.943P_T^{0.7643}10^6$<br>$P_T = Q_D h \rho g \eta 10^{-6}$                                                                                                                                          | 22-24  |
| Power station (NOK)               | $p_2 = (0.4948Q_D + 1.7)10^6$ ( $Q_D \leq 50m^3s^{-1}$ )<br>$p_2 = (-0.0006Q_D^2 + 0.67Q_D - 6.95)10^6$ ( $50m^3s^{-1} < Q_D \leq 500m^3s^{-1}$ )<br>$p_2 = 178.05 \times 10^6$ ( $Q_D \geq 500m^3s^{-1}$ ) | 22-24  |
| Electro-technical equipment (NOK) | $p_3 = 3.9142P_T^{0.6622}10^6$                                                                                                                                                                              | 22-24  |
| Fish passage (USD)                | $p_4 = 1.3e^6(10^3P_T)^{0.56}$                                                                                                                                                                              | 22-24  |
| Miscellaneous (NOK)               | $p_5 = (-38.795\log Q_D + 309.89)P_T10^3$                                                                                                                                                                   | 22-24  |
| Power line connection (NOK)       | $p_6 = Lp_p$                                                                                                                                                                                                | 22, 31 |
| Piping-headrace tunnel (NOK)      | $p_7 = 219.99A_t + 13658(L_p - h)m_t$<br>$m_t = 0.0054(L_p10^{-3})^2 - 0.0039(L_p10^{-3}) + 0.9671$                                                                                                         | 22-24  |
| Piping-penstock (NOK)             | $p_8 = (6D_t + 9.4h)\eta_p10^3$                                                                                                                                                                             | 22-24  |
| <b>Storage components cost</b>    |                                                                                                                                                                                                             |        |
| Dam (NOK)                         | $p_9 = 0.72D_H^{1.8}D_L10^3$                                                                                                                                                                                | 22-24  |
| Land loss cost                    | $p_{10} = A * \text{land value}$                                                                                                                                                                            | 65-67  |
| Population displacement (USD)     | $p_{11} = 5 * \text{GDP/capita}$                                                                                                                                                                            | 68     |
| <b>Composite cost and LCOS</b>    |                                                                                                                                                                                                             |        |
| Seismic hazard cost (USD)         | $p_{12} = 0.05(\sum_{i=1}^9 p_i)$                                                                                                                                                                           |        |
| Owner cost (USD)                  | $p_{14} = 0.2(\sum_{i=1}^{12} p_i)$                                                                                                                                                                         |        |
| Operation and maintenance (USD)   | $p_{15} = 0.02(\sum_{i=1}^{12} p_i)$                                                                                                                                                                        |        |
| LCOS                              | $LCOS = \frac{C_I + \sum_{t=0}^n (M_t(1+r)^{-t}) + \sum_{t=0}^n (C_{ch}(1+r)^{-t})}{\sum_{t=0}^n (E_E(1+r)^{-t})}$                                                                                          | 22-24  |

Note:

$P_T$ : turbine capacity (MW)

$Q_D$ : design discharge ( $m^3 s^{-1}$ )

$h$ : hydraulic head (m)

$\rho$ : density of water ( $\text{kg m}^{-3}$ )

$g$ : acceleration due to gravity,  $9.81 \text{ m s}^{-2}$

$L$ : shortest distance to powerline (km)

$p_p$ : 1,600,000 USD  $\text{km}^{-1}$

$A_t$ : cross-section area of tunnels ( $\text{m}^2$ )

$L_p$ : length of the pipes (m)

$D_t$ : tunnel diameter (m)

$D_H$ : dam height (m)

$D_L$ : dam length (m)

$A$ : the inundation area of the PHS reservoir.

The LCOS calculation method is in *Section 4.3.4*

**Table S3. Sensitivity analysis parameter adjustment scheme (ref. 22).**

|                   | --      | -       | <b>Default</b> | +       | ++      |
|-------------------|---------|---------|----------------|---------|---------|
| Interest rate     | 4%      | 6%      | 8%             | 10%     | 12%     |
| Owners rate       | 10%     | 15%     | 20%            | 25%     | 30%     |
| Construction cost | 0.50 ×  | 0.75 ×  | 1 ×            | 1.25 ×  | 1.5 ×   |
| Distance cost     | 0.50 ×  | 0.75 ×  | 1 ×            | 1.25 ×  | 1.5 ×   |
| Displacement cost | 1 × GDP | 3 × GDP | 5 × GDP        | 7 × GDP | 9 × GDP |
| Lifetime          | 35 yr   | 45 yr   | 55 yr          | 65 yr   | 75 yr   |
| Efficiency        | 68%     | 73%     | 78%            | 83%     | 88%     |
| Land Value        | 0.50 ×  | 0.75 ×  | 1 ×            | 1.25 ×  | 1.5 ×   |

**Table S4. Environmental flow scenarios.** MAF (the mean annual flow), MMF (the mean monthly flow) (*ref. 72*).

| Scenario | Description                                |
|----------|--------------------------------------------|
| Tennant  | $(MMF \leq MAF)$ 0.2 times of MAF          |
|          | $(MMF > MAF)$ 0.4 times of MAF             |
| Tessmann | $(MMF \leq 0.4MAF)$ MMF                    |
|          | $(MMF > MAF)$ 0.4 times of MMF             |
|          | $(0.4MAF < MMF \leq MAF)$ 0.4 times of MAF |
